# Supplementary material for: Trends of socioeconomic equality in mortality amenable to healthcare and health policy in 1992–2013 in Finland: a population-based register study
Source: PubMed Central journal article supplement — BMJ Open. 2018 Dec 18;8(12):e023680. doi: 10.1136/bmjopen-2018-023680 (PMC6303580; doi:10.1136/bmjopen-2018-023680), 2018-12-18
Supplement: bmjopen-2018-023680supp001.pdf [file bmjopen-2018-023680supp001.pdf]

| <b>Cause of death group</b>                                | <b>ICD-10</b>    |                        |
|------------------------------------------------------------|------------------|------------------------|
| <b><i>Ischaemic heart disease mortality</i></b>            | I20–25           |                        |
| <b><i>Alcohol related mortality</i></b>                    |                  |                        |
| Mental and behavioural disorders due to psychoactive use   | F10              |                        |
| Degeneration of nervous system due to alcohol              | G31.2            |                        |
| Epileptic seizures related to alcohol                      | G40.51           |                        |
| Alcoholic polyneuropathy                                   | G62.1            |                        |
| Alcoholic myopathy                                         | G72.1            |                        |
| Alcoholic cardiomyopathy                                   | I42.6            |                        |
| Alcoholic gastritis                                        | K29.2            |                        |
| Alcoholic liver disease                                    | K70              |                        |
| Alcohol induced acute pancreatitis                         | K85.2, K86.0     |                        |
| Maternal care for (suspected) damage to fetus from alcohol | O35.4            |                        |
| Fetus and newborn affected by maternal use of alcohol      | P0.43            |                        |
| Fetal alcohol syndrome (dysmorphic)                        | Q86.0            |                        |
| Accidental poisoning by and exposure to alcohol            | X45              |                        |
| <b><i>Mortality amenable to health</i></b>                 |                  | <b>Age<sup>1</sup></b> |
| Diphtheria, Tetanus, Poliomyelitis, and Varicella          | A35–36, A80, B01 | 1–74                   |
| Rubella                                                    | B06              | 1–74                   |
| Scarlatina                                                 | A38              | 1–74                   |
| Meningococcus                                              | A39              | 1–74                   |
| Erysipelas                                                 | A46              | 1–74                   |
| Legionellosis                                              | A48.1            | 1–74                   |
| Malaria                                                    | B50–54           | 1–74                   |
| Streptococcal pharyngitis                                  | J02.0            | 1–74                   |
| Cellulitis                                                 | L03              | 1–74                   |
| Tuberculosis                                               | A15–19, B90      | 1–74                   |
| Malignant neoplasm of colon and rectum                     | C18–21           | 1–74                   |
| Melanoma of skin                                           | C43              | 1–74                   |
| Malignant neoplasm of skin                                 | C44              | 1–74                   |
| Malignant neoplasm of breast                               | C50              | 1–74                   |
| Malignant neoplasm of cervix uteri                         | C53              | 1–74                   |
| Malignant neoplasm of cervix uteri and body of uterus      | C54–55           | 1–44                   |
| Malignant neoplasm of bladder                              | C67              | 1–74                   |
| Benign tumors                                              | D10–36           | 1–74                   |
| Hypertensive disease                                       | I10–13, I15      | 1–74                   |
| Cerebrovascular disease                                    | I60–69           | 1–74                   |
| Diseases of the thyroid                                    | E00–07           | 1–74                   |
| Diabetes mellitus                                          | E10–14           | 1–49                   |
| Epilepsy                                                   | G40–41           | 1–74                   |
| Asthma                                                     | J45–46           | 15–49                  |
| COPD                                                       | J40–44           | 15–49                  |
| Septicaemia                                                | A40–41           | 1–74                   |
| Malignant neoplasm of testis                               | C62              | 1–74                   |
| Hodgkin’s disease                                          | C81              | 1–74                   |
| Leukaemia                                                  | C91–95           | 1–44                   |
| Rheumatic and other valvular heart disease                 | I01–09           | 1–74                   |
| Influenza                                                  | J09–11           | 1–74                   |
| Pneumonia                                                  | J12–18           | 1–74                   |
| Peptic ulcer                                               | K25–28           | 1–74                   |
| Appendicitis                                               | K35–38           | 1–74                   |
| Abdominal hernia                                           | K40–46           | 1–74                   |
| Cholelithiasis and cholecystitis                           | K80–81           | 1–74                   |

|                                                |                        |      |
|------------------------------------------------|------------------------|------|
| Nephritis, nephrosis, and nephropathy          | N00–09, N17–19, N25–27 | 1–74 |
| Obstructive uropathy and prostatic hyperplasia | N13, N20–21, N35, N40  | 1–74 |
| Maternal death                                 | O00–O99                | All  |
| Congenital cardiovascular anomalies            | Q20–Q28                | 1–74 |

<sup>1</sup>In our study, deaths of people under 25 years old were excluded.
